---

# EXERCISE DOES NOT ENHANCE SHORT-TERM DEPRIVATION-INDUCED OCULAR DOMINANCE PLASTICITY: EVIDENCE FROM DICHOPTIC SURROUND SUPPRESSION

---

A bioRxiv PREPRINT

**Alex S Baldwin\***

McGill Vision Research  
Department of Ophthalmology & Visual Sciences  
McGill University  
Montreal, Quebec, Canada  
alexsbaldwin@gmail.com

**Abigail E Finn**

McGill Vision Research  
Department of Ophthalmology & Visual Sciences  
McGill University  
Montreal, Quebec, Canada  
FinnEA@cardiff.ac.uk

**Hayden M Green**

Exercise Nutrition and Metabolism Laboratory  
Exercise Sciences  
The University of Auckland  
Auckland, New Zealand  
hgre955@aucklanduni.ac.nz

**Nicholas Gant**

Exercise Nutrition and Metabolism Laboratory  
Exercise Sciences  
The University of Auckland  
Auckland, New Zealand  
n.gant@auckland.ac.nz

**Robert F Hess**

McGill Vision Research  
Department of Ophthalmology & Visual Sciences  
McGill University  
Montreal, Quebec, Canada  
robert.hess@mcgill.ca

October 7, 2020

## ABSTRACT

1 The input from the two eyes is combined in the brain. In this combination, the relative strength of  
2 the input from each eye is determined by the ocular dominance. Recent work has shown that this  
3 dominance can be temporarily shifted. Covering one eye with an eye patch for a few hours makes its  
4 contribution stronger. It has been proposed that this shift can be enhanced by exercise. Here, we test  
5 this hypothesis using a dichoptic surround suppression task, and with exercise performed according  
6 to American College of Sport Medicine guidelines. We measured detection thresholds for patches of  
7 sinusoidal grating shown to one eye. When an annular mask grating was shown simultaneously to the  
8 other eye, thresholds were elevated. The difference in the elevation found in each eye is our measure  
9 of relative eye dominance. We made these measurements before and after 120 minutes of monocular  
10 deprivation (with an eye patch). In the control condition, subjects rested during this time. For the  
11 exercise condition, 30 minutes of exercise were performed at the beginning of the patching period.  
12 This was followed by 90 minutes of rest. We find that patching results in a shift in ocular dominance  
13 that can be measured using dichoptic surround suppression. However, we find no effect of exercise  
14 on the magnitude of this shift. We further performed a meta-analysis on the four studies that have  
15 examined the effects of exercise on the dominance shift. Looking across these studies, we find no  
16 evidence for such an effect.

17 **Keywords** binocular vision · exercise · ocular dominance · plasticity · surround suppression · visual plasticity

---

\*corresponding author

## EXERCISE DOES NOT ENHANCE SHORT-TERM DEPRIVATION-INDUCED OCULAR DOMINANCE PLASTICITY

### 18 **1 Introduction**

19 In binocular vision, the inputs from the two eyes are combined in the primary visual cortex. The relative weight given  
20 to the input from one eye over the other is called the “ocular dominance”. Physiologists have revealed maps of areas  
21 of the cortex where the two eye inputs are combined with different weights (Hubel and Wiesel, 1962, 1969; Shmuel  
22 et al., 2010). These “ocular dominance columns” divide the cortex into areas favouring either eye. At a higher level  
23 however, behavioural studies can also measure an overall ocular dominance. They do so with tasks where the relative  
24 combination or competition between the two eyes can be measured (Miles, 1930; Coren and Kaplan, 1973; Ding et al.,  
25 2018). Recent studies have shown that the ocular dominance can be altered. Covering one eye with a patch for a short  
26 period (e.g. two hours) results in a relative increase in that eye’s contribution to binocular vision (Lunghi et al., 2011).  
27 This shift is transient, with the ocular dominance returning to the baseline over a period of approximately one hour.  
28 This “ocular dominance plasticity” effect was first demonstrated using a binocular rivalry task (Lunghi et al., 2011).  
29 It was then confirmed to also affect a series of binocular combination tasks (Zhou et al., 2013; Spiegel et al., 2017).  
30 Imaging studies show effects of the deprivation in primary visual cortex (Tso et al., 2017; Chadnova et al., 2017; Zhou  
31 et al., 2015; Binda et al., 2018). There is evidence from magnetic resonance spectroscopy that the shift involves a  
32 GABA-ergic modulation (Lunghi et al., 2015).

33 Recently, it has been shown that short term patching of one eye also modulates dichoptic surround suppression  
34 (Serrano-Pedraza et al., 2015). In general, surround suppression occurs when the response to a stimulus is reduced  
35 due to the presence of other nearby stimuli. In some contexts the opposite effect can occur (surround facilitation).  
36 Such surround interactions are ubiquitous in vision. They occur at all stages of the visual pathway from the retina  
37 (McIlwain, 1964; Solomon et al., 2006), through the LGN (Levick et al., 1972; Marrocco et al., 1982; Bonin et al.,  
38 2005; Sceniak et al., 2006; Alitto and Usrey, 2008), to the primary visual cortex (Hubel and Wiesel, 1965; Blakemore  
39 and Tobin, 1972; Maffei and Fiorentini, 1976; Gilbert, 1977; Nelson and Frost, 1978; Sceniak et al., 2001; Cavanaugh  
40 et al., 2002; Van den Bergh et al., 2010; Angelucci and Shushruth, 2013) and extrastriate cortex (Allman et al., 1985;  
41 Desimone and Schein, 1987; Born and Bradley, 2005). Surround effects are also found behaviourally. The presence of  
42 a surround affects performance for threshold detection of localized stimuli (Falkner et al., 2010; Reynolds and Heeger,  
43 2009; Sanayei et al., 2015; Foley, 2019). They also affect scene segmentation (Hupé et al., 1998; Park and Tadin, 2014)  
44 and the suprathreshold appearance of stimuli (Andriessen and Bouma, 1976; Cannon and Fullenkamp, 1991; Petrov  
45 et al., 2005; Snowden and Hammett, 1998; Zenger-Landolt and Heeger, 2003). Although surround interactions can  
46 be facilitative or suppressive, in most cases they are suppressive. Their mechanism is thought to involve the GABA  
47 neurotransmitter (Alitto and Dan, 2010; Angelucci and Bressloff, 2006; Gieselmann and Thiele, 2008; Nurminen  
48 and Angelucci, 2014; Smith, 2006). A special case of surround suppression occurs with dichoptic surrounds (where  
49 the target and surround are presented to different eyes). Depending on their methods, studies on dichoptic surround  
50 suppression have found smaller (Chubb et al., 1989) or larger effects (Meese and Hess, 2004; Petrov and McKee, 2006).  
51 These can be reconciled if dichoptic surround suppression involves separate processes occurring at different stages  
52 of the visual system (Webb et al., 2005; Cai et al., 2008, 2012; Schallmo and Murray, 2016; Schallmo et al., 2019).  
53 The recent results from Serrano-Pedraza et al. (2015) indicate that short-term patching of one eye affects the later,  
54 cortical stage of dichoptic surround suppression. Following two and a half hours of patching, the suppressive effect of a  
55 dichoptic surround presented to the non-deprived eye was reduced.

56 Exercise has been shown to be a powerful modulator of visual cortical plasticity in rodents (Sale et al., 2014). A  
57 recent study suggested that this is also the case in human adults (Lunghi and Sale, 2015). Lunghi and Sale (2015)  
58 performed an ocular dominance plasticity study using a binocular rivalry to measure eye dominance. They found  
59 that exercise during the deprivation period enhanced the plastic shift in eye dominance. If true, this would be the  
60 first indication that human visual plasticity can be enhanced by exercise. This would agree with previous evidence  
61 from mouse studies (Baroncelli et al., 2012). Such effects may be mediated via a common change in GABA-ergic  
62 inhibition. Since the Lunghi and Sale (2015) publication, two further studies have been published that do not confirm  
63 their conclusion. The first used a binocular combination paradigm with a comparable exercise regime (Zhou et al.,

## EXERCISE DOES NOT ENHANCE SHORT-TERM DEPRIVATION-INDUCED OCULAR DOMINANCE PLASTICITY

64 2017). The second study was an unsuccessful attempt to replicate the original result of Lunghi and Sale (2015) using a  
65 binocular rivalry task similar to theirs (Finn et al., 2019). In this study, we set out to further investigate the possible  
66 role of exercise in cortical plasticity. We tested whether exercise could enhance the effect of short-term patching on  
67 dichoptic surround suppression. This method allowed us to separately measure the effective suppression from each  
68 eye. We found no significant effect of exercise on the ocular dominance shift from short-term monocular patching.  
69 Furthermore, the patching effect we do find is restricted to a reduction in suppression of the deprived eye. This agrees  
70 with the results from the previous work by Serrano-Pedraza et al. (2015). As in their study, we do not find a reciprocal  
71 *increase* in suppression of the non-deprived eye. To date, studies examining this phenomenon have used intermittent  
72 exercise protocols of variable intensity. The relative exercise load (intensity and duration) is a key determinate of  
73 physiological responses and adaptations to exercise. In the present study we aimed to increase the ecological validity  
74 of existing findings by using an exercise dose that is recommended by health professionals and that was standardized  
75 according to participants' individual levels of cardiorespiratory fitness.

## 76 **2 Experimental Procedures**

### 77 **2.1 Participants**

78 Twenty healthy adult participants volunteered to take part in this study. There were eleven female and nine male  
79 participants, with an average age of 23 years old (range 20 - 28). The average stature was  $1.7 \pm 0.1$  metres, and  
80 average body mass was  $73 \pm 15$  kilograms. Volunteers were eligible to participate if they were free of cardiovascular  
81 disease and musculoskeletal injury. Subjects had normal or corrected-to-normal vision. Each subject took part in three  
82 sessions after giving written informed consent. The study protocol was approved by the University of Auckland Human  
83 Participants Ethics Committee.

### 84 **2.2 Physiological Measurements**

85 The study protocol began with a familiarization session. A cardiopulmonary fitness test was conducted on an  
86 electromagnetically-braked cycle ergometer (Velotron Dynafit Pro, Seattle, WA, USA). We simultaneously mea-  
87 sured ventilation and analysed expired gas composition (pneumotachometer, MLT1000L, gas analyzer, ML206, AD  
88 Instruments) to determine peak oxygen uptake ( $\dot{V}O_2$  peak). Peak and submaximal oxygen uptake values were used to  
89 prescribe a workload equivalent to 60% of  $\dot{V}O_2$  max for the Exercise condition. Heart rate was used as a secondary  
90 assessment of workload prescription. It was measured during the 2 hours of monocular deprivation using a chest strap  
91 heart rate monitor (Polar FT1, Polar Electro, Finland). Data were collected upon eye patching. Further measurements  
92 were made every five minutes in the first forty minutes of monocular deprivation. After this point measurements were  
93 made every ten minutes.

### 94 **2.3 Psychophysical Methods**

95 A measure of interocular suppression was obtained with a dichoptic surround suppression task. Thresholds for detecting  
96 a target grating were determined with a two-interval forced-choice design. Subjects fixated on a central marker, and a  
97 target would appear in only one eye (monocularly) either to the left or right of that marker for 300 ms. The task set to  
98 the subject was to respond whether the target appeared to the left or right of fixation. The target was a circular patch of 4  
99 c/deg grating presented 1.5 degrees of visual angle from the fixation marker (Figure 1A). The edges of the grating were  
100 softened with a raised-cosine envelope that declined from the plateau to zero contrast over 0.25 degrees. The central  
101 plateau was 0.25 degrees wide. Therefore, the full-width at half-magnitude of the grating was 0.5 degrees. This gave  
102 approximately two visible cycles of the carrier grating within the target. In the detection threshold condition (without a  
103 dichoptic mask) the two potential target locations were surrounded by a pair of black circles during stimulus presentation  
104 (25% contrast, diameter of 1.7 deg). In the non-target eye, only the two black circles were shown (Figure 1B).

EXERCISE DOES NOT ENHANCE SHORT-TERM DEPRIVATION-INDUCED OCULAR DOMINANCE PLASTICITY

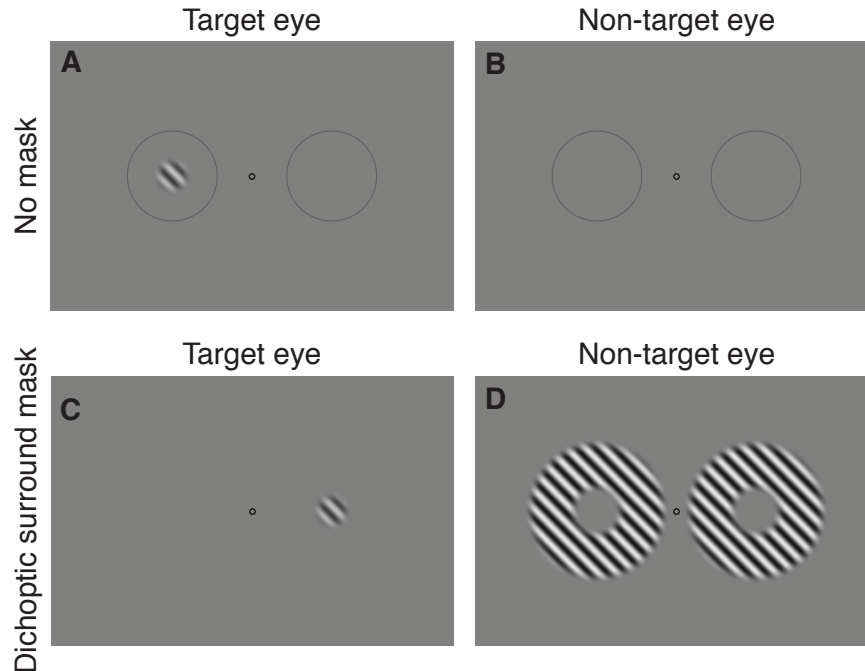

Figure 1: Examples of the two stimulus conditions used in this study. The top row (A-B) shows the simple detection condition where the subject detects a small patch of grating seen only by the target eye. The subject fixates the small central circle. There are two larger circles that indicate the two potential stimulus locations in this two-alternative forced-choice task. The bottom row (C-D) shows the dichoptic surround suppression condition. The stimulus presented to the target eye is the same, except the circles indicating the location of the target are removed. In the non-target eye two annular grating masks are presented, enclosing the two potential target locations.

105 The condition with the dichoptic surround mask is shown in Figure 1C-D. In this condition, the stimulus presented to  
106 the target eye was almost identical to that in the threshold condition. The only difference was that the two black circles  
107 surrounding the target location were not shown (Figure 1C). Instead, an annular grating was presented at both locations  
108 in the non-target eye (Figure 1D). This grating had the same spatial frequency as the target (4 c/deg), but was presented  
109 in the opposite spatial phase (a white bar in the target grating was aligned with a black bar in the annular surround  
110 grating). The same raised-cosine smoothing was applied to the surround as was applied to the target. There was also  
111 small gap between the outer edge of the target and the inner edge of the annular surround grating. At half-magnitude,  
112 the radius of the inner edge of the annular grating was 0.23 deg, and the outer edge was at 0.63 deg. The dichoptic  
113 surround mask grating was presented at 45% contrast. The target contrast was controlled by a pair of interleaved  
114 staircases (Baldwin, 2019) for each eye. Each eye had one 3-down-1-up staircase starting at 21 dB contrast and one  
115 2-down-1-up staircase starting at 27 dB contrast. The staircase step size was 6 dB before the first reversal and 3 dB  
116 thereafter.

## 117 2.4 Experiment Design

118 Subjects first underwent a familiarisation session. This involved practicing the dichoptic surround suppression task  
119 and measurement of cardiorespiratory fitness. Fitness was measured using the maximal aerobic capacity ( $\dot{V}O_2$  max)  
120 test. This familiarisation session was followed by two experimental sessions (see Figure 2). These began with baseline  
121 dichoptic suppression threshold measurements. Subjects then underwent two hours of monocular deprivation (MD) with  
122 an orthoptic eye patch (Nexcare, Opticlud, 3M, Canada). Following patch removal, further post-patching measures  
123 were made at 15 minute intervals (0, 15, 30, 45 minutes). In one of the experimental sessions, participants performed  
124 continuous aerobic exercise for 30 minutes. They exercised on a cycle ergometer at a moderate intensity (60% of

## EXERCISE DOES NOT ENHANCE SHORT-TERM DEPRIVATION-INDUCED OCULAR DOMINANCE PLASTICITY

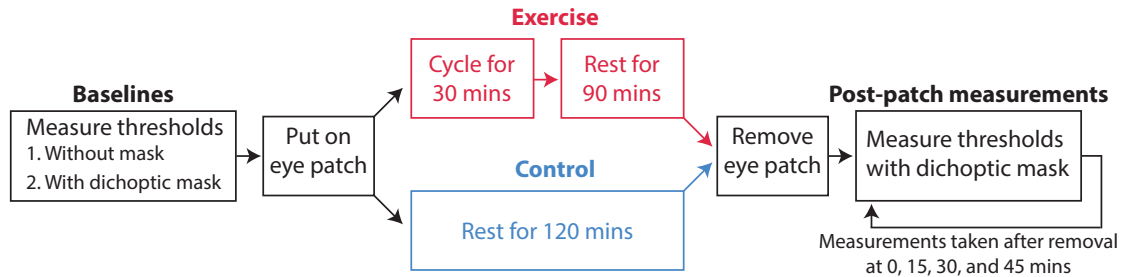

Figure 2: Procedure for testing. On each of the two testing days the subject performed either the exercise or the control condition. During the cycle period, subjects were watching movies on a television screen, whilst in the rest period, for both conditions, subjects sat in a chair and watched movies on a television screen.

125 their  $\dot{V}O_2$  max) to achieve, at least, the minimum duration and intensity of exercise recommended by the American  
126 College of Sports Medicine for health and fitness (American College of Sports Medicine, 2017). This was followed by  
127 seated rest for the remaining 90 minutes of monocular deprivation. In both sessions, participants watched movies on a  
128 television screen throughout the 120 minutes of monocular deprivation. The order of the two experimental treatments,  
129 and the eye to be patched, were allocated randomly in a counterbalanced fashion.

### 130 2.5 Mood Ratings

131 Visual analogue scales (VAS) were used to subjectively assess day-to-day lifestyle changes that could influence  
132 experimental outcomes. Upon arrival to the laboratory, participants were asked to rate their motivation for the testing  
133 session, general stress levels, and diet quality over the preceding 24 hours on a VAS rated from “very bad” to “very  
134 good” for motivation and diet, and “very low” to “very high” for stress levels. During each experimental session VAS  
135 were used at four timepoints to assess valence, arousal and fatigue. These occurred before and after the baseline visual  
136 tests, after the 2 hours patching and following the last visual test. Subjects’ responses were recorded as a fraction of the  
137 scale length. Written cues for valence were “neutral” at 50% of the scale, and “very bad” and “very good” at opposite  
138 ends of the scale. Cues for arousal and fatigue were “not at all” (fatigued or aroused) and “highly fatigued/aroused” on  
139 either end of the scale.

### 140 2.6 Analysis

141 Repeated measures analyses of variance (ANOVA) were used to test the differences between experimental conditions for  
142 heart rate and subjective measures. For heart rate, valence, motivation and arousal the ANOVA factors were condition  
143 (Rest or Exercise) and time. For motivation, diet and stress levels a paired students t-test was used to compare the  
144 two conditions. In cases where assumptions of sphericity were violated Greenhouse-Geisser corrections were applied.  
145 If a main effect was deemed to be statistically significant ( $p < 0.05$ ) post-hoc comparisons were adjusted using the  
146 Bonferroni correction to control for multiple comparisons. These statistical analyses were conducted in SPSS version  
147 24 (IBM, USA).

148 For the psychophysical measurements, contrast detection thresholds were obtained through psychometric function  
149 fitting. The Palamedes toolbox (Prins and Kingdom, 2009) was used to perform this analysis. Data were fit with a  
150 Quick psychometric function (Quick, 1974) by a maximum-likelihood procedure. We calculate differences in threshold  
151 using dB logarithmic units. The formula is

$$\text{dB masking} = 20 \times \log_{10} \left( \frac{\text{threshold with mask}}{\text{threshold without mask}} \right), \quad (1)$$

152 therefore, a difference of 6 dB indicates that the mask approximately doubles the contrast required for detection.

## EXERCISE DOES NOT ENHANCE SHORT-TERM DEPRIVATION-INDUCED OCULAR DOMINANCE PLASTICITY

### 153 3 Results

#### 154 3.1 Physiological Measurements

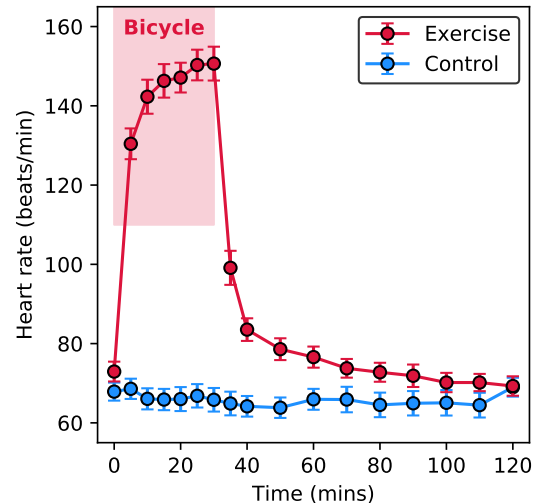

Figure 3: Heart Rate during the two hours of monocular deprivation for the Rest and Exercise conditions. Rest vs. Exercise  $p < 0.05$  at time levels 5, 10, 15, 20, 25, 30, 35, 40, 50, 70 minutes.

155 The heart rate measurements are presented in Figure 3. The mean  $\dot{V}O_2$  peak was  $43 \pm 9 \text{ ml.kg}^{-1}.\text{min}^{-1}$ . The average  
156 workload performed for 30 minutes during the Exercise condition was  $123 \pm 34 \text{ W}$  (equivalent to 60% of  $VO_2$  max).  
157 A technical error occurred during sub-maximal stages for one subject. Their workload was estimated using the peak  
158 workload recorded during the test. An ANOVA was performed on the heart rate measurements. There were significant  
159 main effects of condition and time as well as a condition x time interaction effect observed with the ANOVA for both  
160 main and interaction effects. As expected, post-hoc comparisons showed a higher heart rate at all time levels during  
161 physical exercise and the initial phase of the recovery period ( $p < 0.05$  at 5-50 minutes and 80 minutes patched). Three  
162 subjects' heart rate data were excluded from analysis due to equipment-related data loss.

#### 163 3.2 Psychophysical Results

164 The results from the psychophysical task are presented in Figure 4. The graphs in the top row plot the threshold  
165 elevation caused by the dichoptic surround mask for each timepoint. This is given in logarithmic dB units, so that a  
166 value of 0 dB would mean "no effect". Each 6 dB increase on this axis indicates a doubling of the unmasked threshold.  
167 The leftmost points in each plot give the baseline measurements made before patching. For the condition where the  
168 target was shown to the patched eye (Figure 4A) the average baseline measurements were between 9 and 12 dB. When  
169 the target was shown to the non-patched eye, the baselines were also around 12 dB. These masking measurements mean  
170 that the threshold contrast for detecting the target increased by around a factor of four when the surround mask (at 45%  
171 contrast) was presented in the other eye.

172 The average threshold elevations at baseline measured on each testing day ("Exercise" and "Control") are indicated  
173 by horizontal lines in Figure 4A-B. Any changes as a result of short-term patching are judged relative to the baseline  
174 from the appropriate testing day. That allows us to investigate how the patching affects the strength of the dichoptic  
175 interactions. Immediately following patch removal ("0" on the x-axis) the amount of masking for targets in the patched  
176 eye decreased (Figure 4A), whereas in the non-patched eye it increased slightly (Figure 4B). The amount of masking

EXERCISE DOES NOT ENHANCE SHORT-TERM DEPRIVATION-INDUCED OCULAR DOMINANCE PLASTICITY

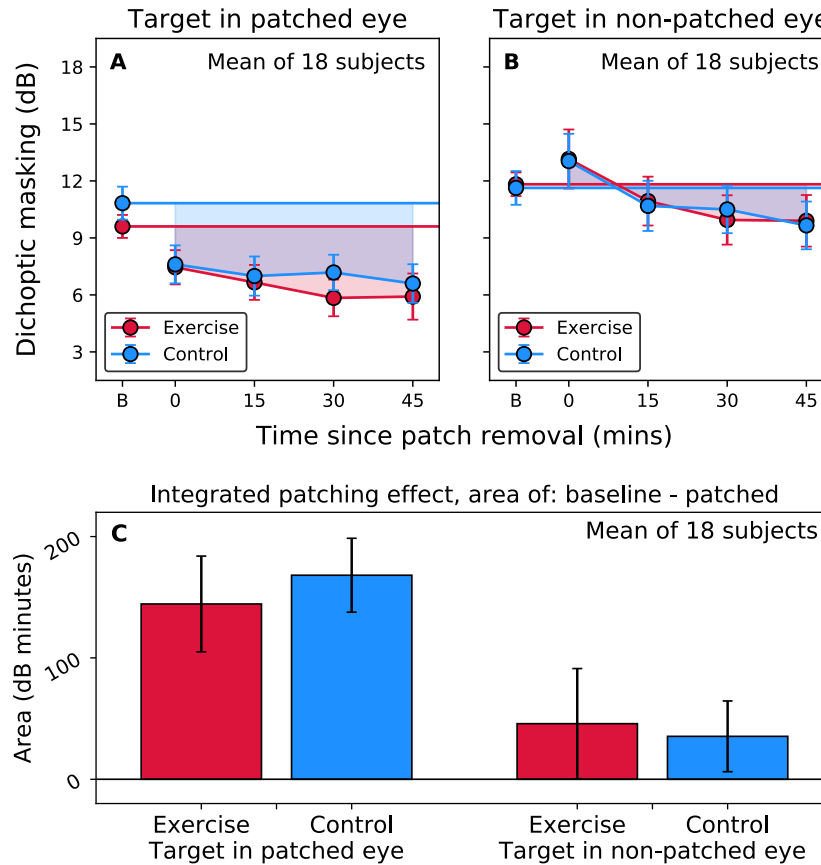

Figure 4: Masking from the dichoptic surround grating. Error bars give the standard error of the mean calculated over 18 subjects. Masking is presented for the condition where the target was presented to the patched eye and the mask to the non-patched eye (panel A), and vice-versa (panel B). The horizontal lines give the baseline masking, with the points at 0, 15, 30, and 45 minutes giving the masking measured at that time after patch removal. The area between the patched data and the baseline give an index of the overall patching effect (note that in panel B the 0 minute datapoint is above the baseline, giving that part an area which counts as negative in our analysis). The average areas calculated across subjects are presented in panel C. For both pairs of bars, the differences between the Exercise and Control conditions were not significant when tested with the Wilcoxon signed-rank test in SciPy.

177 measured at this timepoint in the patched eye was almost identical for the exercise and control conditions. There was  
178 however a difference in the baseline values measured on those two testing days. This means that the shift was actually  
179 larger for the control condition (where subjects rested) than it was in the exercise condition.

180 Surprisingly, the measurements taken at subsequent timepoints do not show a decrease in this shift. If anything,  
181 there was a trend for the change in masking to increase over the next 45 minutes. In the non-patched eye, we also see a  
182 downward trend (less masking) over that time period. This means that by the 15 minute timepoint the effect of patching  
183 appears to have reversed. The results from both eyes therefore show a trend for decreased masking over time. We  
184 hypothesise that this trend may be a separate effect from the asymmetric shift in ocular dominance that patching causes.

185 We performed a three-way within-subjects ANOVA in R (RStudio Team, 2016), with factors of condition (exercise  
186 or control), target eye (patched or non-patched), and timepoint post-patching. The dependent variable was the shift in  
187 masking from the baseline measured for each subject before patching. The effect of condition alone was not significant  
188 ( $F_{1,17} = 0.05$ ,  $P = 0.828$ ), nor were there any significant interactions involving condition. There were significant effects  
189 of target eye ( $F_{1,17} = 11.08$ ,  $P = 0.004$ ) and timepoint ( $F_{3,51} = 11.78$ ,  $P < 0.001$ ), and a significant interaction between

## EXERCISE DOES NOT ENHANCE SHORT-TERM DEPRIVATION-INDUCED OCULAR DOMINANCE PLASTICITY

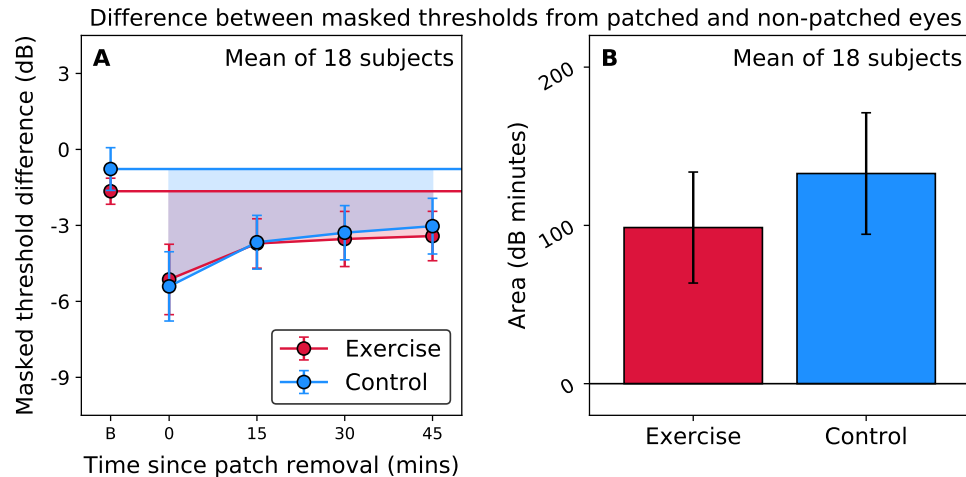

Figure 5: Ocular dominance analysis, based on the differences between masked thresholds (in dB units) measured from the two eyes (A). A masked threshold difference of zero dB would mean that the two eyes were balanced. The horizontal lines give the baseline imbalance, with the points at 0, 15, 30, and 45 minutes giving the measured value at each time point after patch removal. The area between the patched data and the baseline give an index of the overall patching effect. The average areas calculated across subjects are presented in panel B. The difference between the Exercise and Control conditions was not significant when tested with the Wilcoxon signed-rank test in SciPy.

190 the two ( $F_{3,51} = 5.14$ ,  $P = 0.004$ ). Therefore, this analysis shows our expected patching effect, but does not support any  
191 strengthening of that effect by exercise.

192 Figure 4C shows the overall effect of patching. This is calculated as the area of the polygon defined by the baseline  
193 (flat lines in Figure 4A-B) and the data between the 0 and 45 minute timepoints. These are the shaded areas in  
194 Figure 4A-B. Areas above the baseline are counted as negative. These will be subtracted from the total area. We  
195 calculated these areas individually for each subject. In Figure 4C we show the mean and standard error of the 18  
196 individual subject values. Numerically, this analysis indicates a slightly stronger patching effect in the control condition.  
197 We compared the two conditions using a Wilcoxon signed-rank test performed in SciPy (Jones et al., 2001). The  
198 difference was not significant ( $w = 60$ ,  $P = 0.267$ ). The difference between the two conditions in the non-patched eye  
199 was also non-significant ( $w = 83$ ,  $P = 0.913$ ).

200 With the data from Figure 4, we performed a further analysis looking at the differences between the effects measured  
201 in the patched and non-patched eyes. In Figure 5A, each data point is essentially the result of subtracting the equivalent  
202 data point in Figure 4B from that in Figure 4A. The baseline value is now the difference between the baseline masking  
203 values measured from the two eyes. The hypothesised general downward trend in masking over time is now factored-out  
204 of the analysis. We see post-patching the typical initial peak in ocular dominance shift. This is followed by a gradual  
205 return toward the baseline value. We performed a two-way within-subjects ANOVA in R, with factors of condition  
206 (exercise or control) and timepoint post-patching. The dependent variable was the difference between the masked  
207 thresholds measured in the two eyes. This was normalised to be relative to the baseline difference calculated for each  
208 subject. In agreement with the ANOVA in the previous section, the effect of condition alone was not significant  $F_{1,17} =$   
209  $2.21$ ,  $P = 0.156$ . There was also no significant interaction between condition and timepoint  $F_{3,51} = 0.15$ ,  $P = 0.927$ .  
210 There was however a significant effect of timepoint  $F_{3,51} = 5.14$ ,  $P < 0.004$ .

211 We also calculated the area between the baseline and the patched data (shaded regions in Figure 5A). The mean  
212 areas calculated across 18 subjects (with standard errors) are presented in Figure 5B. As in Figure 4C, the patching  
213 effect appears to be slightly stronger under the rest condition than under the exercise condition. The direction of this  
214 trend is the opposite of the effect reported by Lunghi et al. (2015). The difference we find was not significant however  
215 by a Wilcoxon signed-rank test ( $w = 60$ ,  $P = 0.267$ ).



## EXERCISE DOES NOT ENHANCE SHORT-TERM DEPRIVATION-INDUCED OCULAR DOMINANCE PLASTICITY

Table 1: Mood scores for the exercise and control conditions. Valence is rated “neutral” at 50% whilst fatigue and arousal are rated “not at all” at 0%. Values are reported as mean  $\pm$  standard deviation.

|             |          | Baseline    | Post-baseline | Post-MD     | Post-follow-up |
|-------------|----------|-------------|---------------|-------------|----------------|
| Valence (%) | Control  | 80 $\pm$ 10 | 74 $\pm$ 13   | 72 $\pm$ 11 | 71 $\pm$ 14    |
|             | Exercise | 79 $\pm$ 10 | 75 $\pm$ 12   | 72 $\pm$ 13 | 69 $\pm$ 14    |
| Arousal (%) | Control  | 57 $\pm$ 16 | 48 $\pm$ 16   | 49 $\pm$ 15 | 42 $\pm$ 16    |
|             | Exercise | 50 $\pm$ 12 | 49 $\pm$ 14   | 56 $\pm$ 11 | 43 $\pm$ 16    |
| Fatigue (%) | Control  | 36 $\pm$ 19 | 37 $\pm$ 17   | 40 $\pm$ 21 | 44 $\pm$ 18    |
|             | Exercise | 39 $\pm$ 21 | 41 $\pm$ 20   | 37 $\pm$ 19 | 44 $\pm$ 18    |

### 216 3.3 Mood and Effort Sense

217 There were no differences between the two conditions for motivation ( $t_{18} = 0.06$ ,  $P = 0.956$ ), diet ( $t_{18} = 1.38$ ,  $P =$   
218 0.184) and stress levels ( $t_{18} = -0.56$ ,  $P = 0.586$ ) prior to starting the experiment. There was also no effect of condition  
219 for valence, arousal or fatigue. There was however a significant effect of time for valence ( $F_{1,57,28,23} = 12.01$ ,  $P <$   
220 0.001), arousal ( $F_{3,54} = 10.77$ ,  $P < 0.001$ ), and fatigue ( $F_{3,54} = 2.99$ ,  $P < 0.001$ ). Valence during the experiments  
221 decreased significantly compared to baseline ( $P < 0.05$ ). Arousal decreased following surround suppression threshold  
222 measurements that occurred before and after monocular deprivation ( $P < 0.05$  baseline vs. post-baseline, post-MD vs.  
223 post-follow up and baseline vs. post follow-up) but did not decrease over the monocular deprivation period ( $P > 0.05$   
224 post-baseline vs. post-MD). One participant was excluded from the analysis due to incorrectly answered questionnaires.

### 225 4 Discussion

226 In this study we replicate the finding first reported by Serrano-Pedraza et al. (2015) that short-term monocular deprivation  
227 results in a modulation of dichoptic surround suppression. This is consistent with deprivation strengthening the binocular  
228 contribution of the patched eye (Lunghi et al., 2011; Zhou et al., 2013). When the surround mask is presented to the eye  
229 that had been patched, its suppressive effect on a target in the non-patched eye is (mildly) enhanced. When the target is  
230 presented to the patched eye and the mask to the non-patched eye, the suppression is diminished. These near surround  
231 effects are thought to involve horizontal connections in V1 (Angelucci et al., 2017). We assume that their dichoptic  
232 nature reflects interactions across eye columns in layer 4 of V1 (Yoshioka et al., 1996) or between binocular neurones  
233 in more superficial layers of V1 (Webb et al., 2005). The site of the ocular dominance changes induced by short-term  
234 deprivation is also thought to be in V1. This is based on evidence from human psychophysics (Zhou et al., 2014), and  
235 primate brain imaging (Tso et al., 2017; Chadnova et al., 2017; Lunghi et al., 2015; Binda et al., 2018).

236 Standardised exercise on a stationary bicycle was not shown to enhance the effect of monocular deprivation in this  
237 study. The current study is the fourth investigation of whether exercise enhances the shift in ocular dominance induced  
238 by short-term monocular deprivation. The first of these (Lunghi et al., 2015) found such an effect. This was followed-up  
239 by Zhou et al. (2017), who found no effect of exercise. A possible distinction between those two studies was that Lunghi  
240 et al. (2015) used a binocular rivalry task, whereas Zhou et al. (2017) used a phase combination task. It has been shown  
241 that the effects of monocular deprivation can vary depending on the task used to measure them (Bai et al., 2017; Baldwin  
242 and Hess, 2018). For that reason, Finn et al. (2019) attempted to replicate Lunghi et al. (2015) with a binocular rivalry  
243 task. They found no significant effect of exercise, and so failed to replicate the original finding. Previous studies have  
244 all used intermittent exercise of fixed intensity, but in the present study we increased ecological validity by prescribing  
245 exercise according to recognised guidelines and individualised capacities (determined by cardiorespiratory fitness test).  
246 We found that exercise performed according to the American College of Sport Medicine’s guidelines (American College  
247 of Sports Medicine, 2017) for maintaining physical health and well-being did not increase ocular-dominance shift. It  
248 may be inferred that an ocular-dominance shift is unlikely to be elicited by doses of physical activity undertaken by  
249 members of the exercising public following recommended guidelines.

## EXERCISE DOES NOT ENHANCE SHORT-TERM DEPRIVATION-INDUCED OCULAR DOMINANCE PLASTICITY

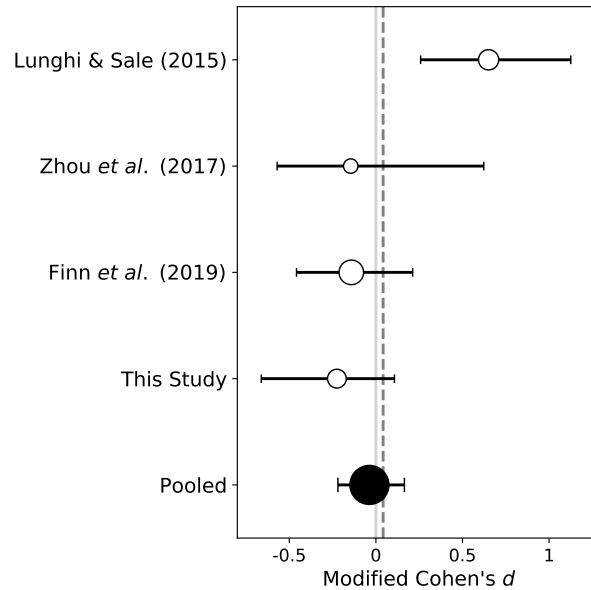

Figure 6: Data were taken from the four studies looking for an effect of exercise on the ocular-dominance shift. A meta-analysis was performed looking at the main result (effect of exercise) over those four studies. The areas of the circle marker symbols are proportional to the sample size in each study. The bottom symbol gives the result from pooling data across all four studies. The vertical grey line at zero indicates no effect. The dashed black line is the average of the four points, weighted by the number of subjects in each study..

250 We performed a meta-analysis by combining the effects calculated from data from four studies looking at the effects  
251 of exercise on ocular dominance plasticity (including this study). These data are summarised in Figure 6. For Lunghi  
252 et al. (2015), the ocular dominance index measures were calculated. The use of this measure (rather than the mean  
253 phase duration used in the original study) is justified in Finn et al. (2019). A modified Cohen's  $d$  score was calculated

$$d = \frac{y_{\text{exercise}} - y_{\text{control}}}{\sqrt{\frac{1}{2} \times (\sigma_{\text{exercise}}^2 + \sigma_{\text{control}}^2)}}. \quad (2)$$

254 The markers in Figure 6 give the values calculated from each study's data. The bottom data point is the data pooled  
255 across all four studies. Data were normalised by the mean patching effect obtained (averaged across exercise and  
256 control) in their study before pooling. A score of zero indicates no effect of exercise. Positive numbers mean that  
257 exercise enhances the shift in ocular dominance. Negative numbers mean that exercise suppresses the shift. The error  
258 bars on the points in Figure 5 give the 95% confidence interval calculated from non-parametric bootstrapping (2000  
259 samples). We only see evidence for an effect in the first study Lunghi et al. (2015). In fact, the three subsequent studies  
260 all show small shifts (non-significant) in the opposite direction. In a similar vein, it has recently been shown that  
261 exercise does not enhance visual perceptual learning either (Connell et al., 2018; Campana et al., 2020).

## 262 5 Additional information

### 263 5.1 Acknowledgements

264 This work was funded both by an ERA-NET Neuron grant (JTC 2015) awarded to Robert F. Hess, and by University of  
265 Auckland funding to Nicholas Gant. This pre-print manuscript was written in  $\text{\LaTeX}$  using TeXShop. It is formatted  
266 with a custom style available at: [github.com/alexsaldwin/biorxiv-inspired-latex-style](https://github.com/alexsaldwin/biorxiv-inspired-latex-style).

## EXERCISE DOES NOT ENHANCE SHORT-TERM DEPRIVATION-INDUCED OCULAR DOMINANCE PLASTICITY

### 267 5.2 Author contributions in CREDIT format

268 **Alex S Baldwin:** Conceptualization, Methodology, Software, Validation, Formal Analysis, Investigation, Data Curation,  
269 Writing - Original Draft, Writing - Review & Editing, Visualization, Supervision, Funding Acquisition; **Abigail E**  
270 **Finn:** Conceptualization, Methodology, Validation, Investigation, Writing - Review & Editing; **Hayden M Green:**  
271 Conceptualization, Methodology, Validation, Investigation, Formal Analysis, Investigation, Data Curation, Writing -  
272 Original Draft, Writing - Review & Editing, Visualization, Supervision; **Nicholas Gant:** Conceptualization, Method-  
273 ology, Resources, Writing - Review & Editing, Supervision, Project Administration, Funding Acquisition; **Robert F**  
274 **Hess:** Conceptualization, Methodology, Resources, Writing - Review & Editing, Supervision, Project Administration,  
275 Funding Acquisition.

## 276 6 Appendix: outlier removal

### 277 6.1 Experiment Design

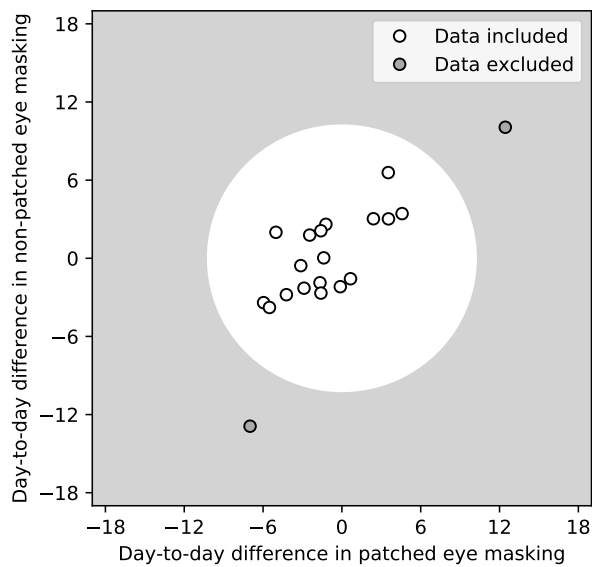

Figure 7: The method by which outlier subjects were removed. The day-to-day differences in the baseline masking effect measured in the patched ( $x$ -axis) and non-patched ( $y$ -axis) eyes are plotted. Data outside the white circle are outliers. The criteria for inclusion were determined using a method based on that proposed by (Tukey, 1970). The mean-normalised data were combined for the two eyes. The first (Q1) and third (Q3) quartiles were found, and the interquartile range (IQR). The maximum allowable day-to-day difference was the average of  $|Q1 - 1.5 \times IQR|$  and  $|Q3 + 1.5 \times IQR|$ , this came out as a 10 dB maximum day-to-day difference.

278 Of the twenty subjects we tested, two were removed from further analysis. The removal was based on the day-to-day  
279 differences in the dichoptic surround masking measured at baseline. The method by which this was performed is  
280 illustrated in Figure S1.

## 281 References

282 Alitto, H. J. and Dan, Y. (2010). Function of inhibition in visual cortical processing. *Current Opinion in Neurobiology*, 20(3):340–346.  
283 Alitto, H. J. and Usrey, W. M. (2008). Origin and dynamics of extraclassical suppression in the lateral geniculate nucleus of the  
284 macaque monkey. *Neuron*, 57:135–146.

EXERCISE DOES NOT ENHANCE SHORT-TERM DEPRIVATION-INDUCED OCULAR DOMINANCE PLASTICITY

- 285 Allman, J., Miezin, F., and McGuinness, E. (1985). Stimulus specific responses from beyond the classical receptive field: neurophysiological mechanisms for local-global comparisons in visual neurons. *Annual Review of Neuroscience*, 8:407–430.
- 286
- 287 American College of Sports Medicine (2017). *ACSM's guidelines for exercise testing and prescription*. Lippincott Williams & Wilkins.
- 288
- 289 Andriessen, J. J. and Bouma, H. (1976). Eccentric vision: adverse interactions between line segments. *Vision Research*, 16:71–78.
- 290 Angelucci, A., Bijanzadeh, M., Nurminen, L., Federer, F., Merlin, S., and Bressloff, P. C. (2017). Circuits and Mechanisms for Surround Modulation in Visual Cortex. *Annual Review of Neuroscience*, 40(1):425–451.
- 291
- 292 Angelucci, A. and Bressloff, P. C. (2006). Chapter 5 Contribution of feedforward, lateral and feedback connections to the classical receptive field center and extra-classical receptive field surround of primate V1 neurons. *Progress in Brain Research*, 154(SUPPL. A):93–120.
- 293
- 294
- 295 Angelucci, A. and Shushruth, S. (2013). Beyond the classical receptive field: surround modulation in primary visual cortex. In *The New Visual Neurosciences*, pages 425–444.
- 296
- 297 Bai, J., Dong, X., He, S., and Bao, M. (2017). Monocular deprivation of Fourier phase information boosts the deprived eye's dominance during interocular competition but not interocular phase combination. *Neuroscience*, 352:122–130.
- 298
- 299 Baldwin, A. S. (2019). alexsbaldwin/MatlabStaircase: v0.9.0.
- 300 Baldwin, A. S. and Hess, R. F. (2018). The mechanism of short-term monocular deprivation is not simple: separate effects on parallel and cross-oriented dichoptic masking. *Scientific Reports*, 8(6191):1–8.
- 301
- 302 Baroncelli, L., Bonaccorsi, J., Milanese, M., Bonifacino, T., Giribaldi, F., Manno, I., Cenni, M. C., Berardi, N., Bonanno, G., Maffei, L., and Sale, A. (2012). Enriched experience and recovery from amblyopia in adult rats: Impact of motor, social and sensory components. *Neuropharmacology*, 62(7):2388–2397.
- 303
- 304
- 305 Binda, P., Kurzawski, J. W., Lunghi, C., Biagi, L., Tosetti, M., and Morrone, M. C. (2018). Response to short-term deprivation of the human adult visual cortex measured with 7T bold. *eLife*, 7(e40014):1–25.
- 306
- 307 Blakemore, C. and Tobin, E. A. (1972). Lateral inhibition between orientation detectors in the cat's visual cortex. *Experimental Brain Research*, 15:439–440.
- 308
- 309 Bonin, V., Mante, V., and Carandini, M. (2005). The suppressive field of neurons in lateral geniculate nucleus. *Journal of Neuroscience*, 25(47):10844–10856.
- 310
- 311 Born, R. T. and Bradley, D. C. (2005). Structure and Function of visual area MT. *Annual Review of Neuroscience*, 28:157–189.
- 312 Cai, Y., Zhou, T., and Chen, L. (2008). Effects of binocular suppression on surround suppression. *Journal of Vision*, 8(9)(9):1–10.
- 313 Cai, Y.-C., Lu, S., and Li, C.-Y. (2012). Interactions between surround suppression and interocular suppression in human vision. *PLoS ONE*, 7(5)(e38093):1–8.
- 314
- 315 Campana, G., Fongoni, L., Astle, A., and McGraw, P. V. (2020). Does physical exercise and congruent visual stimulation enhance perceptual learning? *Ophthalmic and Physiological Optics*, pages 1–12.
- 316
- 317 Cannon, M. W. and Fullenkamp, S. C. (1991). A transducer model for contrast perception. *Vision Research*, 31(6):983–998.
- 318 Cavanaugh, J. R., Bair, W., and Movshon, J. A. (2002). Nature and interaction of signals from the receptive field center and surround in Macaque V1 neurons. *Journal of Neurophysiology*, 88:2530–2546.
- 319
- 320 Chadnova, E., Reynaud, A., Clavagnier, S., and Hess, R. F. (2017). Short-term monocular occlusion produces changes in ocular dominance by a reciprocal modulation of interocular inhibition. *Scientific Reports*, 7(41747):1–6.
- 321
- 322 Chubb, C., Sperling, G., and Solomon, J. A. (1989). Texture interactions determine perceived contrast. *Proceedings of the National Academy of Sciences of the United States of America*, 86:9631–9635.
- 323
- 324 Connell, C. J. W., Thompson, B., Green, H., Sullivan, R. K., and Gant, N. (2018). Effects of regular aerobic exercise on visual perceptual learning. *Vision Research*, 152:110–117.
- 325
- 326 Coren, S. and Kaplan, C. P. (1973). Patterns of ocular dominance. *American Journal of Optometry and Archives of the American Academy of Optometry*, 50(4):283–292.
- 327
- 328 Desimone, R. and Schein, S. J. (1987). Visual properties of neurons in area V4 of the macaque: sensitivity to stimulus form. *Journal of Neurophysiology*, 57(3):835–868.
- 329
- 330 Ding, Y., Naber, M., Gayet, S., Van der Stigchel, S., and Paffen, C. L. E. (2018). Assessing the generalizability of eye dominance across binocular rivalry, onset rivalry, and continuous flash suppression. *Journal of Vision*, 18(6)(6):1–13.
- 331

EXERCISE DOES NOT ENHANCE SHORT-TERM DEPRIVATION-INDUCED OCULAR DOMINANCE PLASTICITY

- 332 Falkner, A. L., Krishna, B. S., and Goldberg, M. E. (2010). Surround suppression sharpens the priority map in the lateral intraparietal  
333 area. *Journal of Neuroscience*, 30(38):12787–12797.
- 334 Finn, A. E., Baldwin, A. S., Reynaud, A., and Hess, R. F. (2019). Visual plasticity and exercise revisited: no evidence for a "cycling  
335 lane". *Journal of Vision*, 19(6)(21):1–10.
- 336 Foley, J. M. (2019). Lateral effects in pattern vision. *Journal of Vision*, 19(9):8.
- 337 Gieselmann, M. A. and Thiele, A. (2008). Comparison of spatial integration and surround suppression characteristics in spiking  
338 activity and the local field potential in macaque V1. *European Journal of Neuroscience*, 28(3):447–459.
- 339 Gilbert, C. D. (1977). Laminar differences in receptive field properties of cells in cat primary visual cortex. *Journal of Physiology*,  
340 268:391–421.
- 341 Hubel, D. H. and Wiesel, T. N. (1962). Receptive fields, binocular interaction and functional architecture in the cat's visual cortex.  
342 *Journal of Physiology*, 160:106–154.
- 343 Hubel, D. H. and Wiesel, T. N. (1965). Binocular interaction in striate cortex of kittens reared with artificial squint. *Journal of*  
344 *Neurophysiology*, 28(6):1041–1059.
- 345 Hubel, D. H. and Wiesel, T. N. (1969). Anatomical demonstration of columns in the monkey striate cortex. *Nature*, 221:747–750.
- 346 Hupé, J. M., James, A. C., Payne, B. R., Lomber, S. G., Girard, P., and Bullier, J. (1998). Cortical feedback improves discrimination  
347 between figure and background by V1, V2 and V3 neurons. *Nature*, 394:784–787.
- 348 Jones, E., Oliphant, E., Peterson, P., and Others (2001). SciPy: Open Source Scientific Tools for Python.
- 349 Levick, W. R., Cleland, B. G., and Dubin, M. W. (1972). Lateral geniculate neurons of cat: retinal inputs and physiology. *Investigative*  
350 *Ophthalmology*, 11(5):302–311.
- 351 Lunghi, C., Burr, D. C., and Morrone, C. (2011). Brief periods of monocular deprivation disrupt ocular balance in human adult  
352 visual cortex. *Current Biology*, 21(14):R538–R539.
- 353 Lunghi, C., Emir, U. E., Morrone, M. C., and Bridge, H. (2015). Short-Term monocular deprivation alters GABA in the adult human  
354 visual cortex. *Current Biology*, 25(11):1496–1501.
- 355 Lunghi, C. and Sale, A. (2015). A cycling lane for brain rewiring. *Current Biology*, 25(23):R1122–R1123.
- 356 Maffei, L. and Fiorentini, A. (1976). The unresponsive regions of visual cortical receptive fields. *Vision Research*, 16:1131–1139.
- 357 Marrocco, R. T., McClurkin, J. W., and Young, R. A. (1982). Spatial summation and conduction latency classification of cells of the  
358 lateral geniculate nucleus of macaques. *Journal of Neuroscience*, 2(9):1275–1291.
- 359 McIlwain, J. T. (1964). Receptive fields of optic tract axons and lateral geniculate cells: peripheral extent and barbiturate sensitivity.  
360 *Journal of Neurophysiology*, 27(6):1154–1173.
- 361 Meese, T. S. and Hess, R. F. (2004). Low spatial frequencies are suppressively masked across spatial scale, orientation, field position,  
362 and eye of origin. *Journal of Vision*, 4:843–859.
- 363 Miles, W. R. (1930). Ocular dominance in human adults. *Journal of General Psychology*, 4:412–430.
- 364 Nelson, J. I. and Frost, B. J. (1978). Orientation-selective inhibition from beyond the classic visual receptive field. *Brain Research*,  
365 139:359–365.
- 366 Nurminen, L. and Angelucci, A. (2014). Multiple components of surround modulation in primary visual cortex: Multiple neural  
367 circuits with multiple functions? *Vision Research*, 104:47–56.
- 368 Park, W. J. and Tadin, D. (2014). Mechanisms of motion-based object segregation. *Journal of Vision*, 14(10):259–259.
- 369 Petrov, Y., Carandini, M., and McKee, S. (2005). Two distinct mechanisms of suppression in human vision. *Journal of Neuroscience*,  
370 25(38):8704–8707.
- 371 Petrov, Y. and McKee, S. P. (2006). The effect of spatial configuration on surround suppression of contrast sensitivity. *Journal of*  
372 *Vision*, 6:224–238.
- 373 Prins, N. and Kingdom, F. A. A. (2009). Palamedes: Matlab routines for analyzing psychophysical data.
- 374 Quick, R. F. (1974). A vector-magnitude model of contrast detection. *Kybernetik*, 16:65–67.
- 375 Reynolds, J. H. and Heeger, D. J. (2009). The normalization model of attention. *Neuron*, 61:168–185.

EXERCISE DOES NOT ENHANCE SHORT-TERM DEPRIVATION-INDUCED OCULAR DOMINANCE PLASTICITY

- 376 RStudio Team (2016). RStudio: Integrated Development for R.
- 377 Sale, A., Berardi, N., and Maffei, L. (2014). Environment and brain plasticity: towards an endogenous pharmacotherapy. *Physiological Reviews*, 94:189–234.
- 378
- 379 Sanayei, M., Herrero, J. L., Distler, C., and Thiele, A. (2015). Attention and normalization circuits in macaque V1. *European Journal of Neuroscience*, 41:949–964.
- 380
- 381 Sceniak, M. P., Chatterjee, S., and Callaway, E. M. (2006). Visual spatial summation in macaque geniculocortical afferents. *Journal of Neurophysiology*, 96:3474–3484.
- 382
- 383 Sceniak, M. P., Hawken, M. J., and Shapley, R. (2001). Visual spatial characterization of macaque V1 neurons. *Journal of Neurophysiology*, 85(5):1873–1887.
- 384
- 385 Schallmo, M.-P., Kale, A. M., and Murray, S. O. (2019). The time course of different surround suppression mechanisms. *Journal of Vision*, 19(4)(12):1–14.
- 386
- 387 Schallmo, M.-P. and Murray, S. O. (2016). Identifying separate components of surround suppression. *Journal of Vision*, 16(1)(2):1–12.
- 388
- 389 Serrano-Pedraza, I., Arranz-Paraiso, S., Romero-Ferreiro, V., Read, J., and Bridge, H. (2015). Short-term monocular deprivation reduces inter ocular surround suppression. *Journal of Vision*, 15(12):379–379.
- 390
- 391 Shmuel, A., Chaimow, D., Raddatz, G., Ugurbil, K., and Yacoub, E. (2010). Mechanisms underlying decoding at 7 T: ocular dominance columns, broad structures, and macroscopic blood vessels in V1 convey information on the stimulated eye. *NeuroImage*, 49:1957–1964.
- 392
- 393 Smith, M. A. (2006). Surround suppression in the early visual system. *Journal of Neuroscience*, 26(14):3624–3625.
- 394
- 395 Snowden, R. J. and Hammett, S. T. (1998). The effects of surround contrast on contrast thresholds, perceived contrast and contrast discrimination. *Vision Research*, 38:1935–1945.
- 396
- 397 Solomon, S. G., Lee, B. B., and Sun, H. (2006). Suppressive surrounds and contrast gain in magnocellular-pathway retinal ganglion cells of macaque. *Journal of Neuroscience*, 26(34):8715–8726.
- 398
- 399 Spiegel, D. P., Baldwin, A. S., and Hess, R. F. (2017). Ocular dominance plasticity: inhibitory interactions and contrast equivalence. *Scientific Reports*, 7(39913):1–9.
- 400
- 401 Tso, D., Miller, R., and Begum, M. (2017). Neuronal responses underlying shifts in interocular balance induced by short-term deprivation in adult macaque visual cortex. *Journal of Vision*, 17(10):576.
- 402
- 403 Tukey, J. W. (1970). Schematic plots. In *Exploratory Data Analysis*, chapter 2E, pages 47–48. Addison Wesley Publishing Company, Reading, MA.
- 404
- 405 Van den Bergh, G., Zhang, B., Arckens, L., and Chino, Y. M. (2010). Receptive-field properties of V1 and V2 neurons in mice and Macaque monkeys. *Journal of Comparative Neurology*, 518:2051–2070.
- 406
- 407 Webb, B. S., Dhruv, N. T., Solomon, S. G., Tailby, C., and Lennie, P. (2005). Early and late mechanisms of surround suppression in striate cortex of macaque. *Journal of Neuroscience*, 25(50):11666–11675.
- 408
- 409 Yoshioka, T., Blasdel, G. G., Levitt, J. B., and Lund, J. S. (1996). Relation between patterns of intrinsic lateral connectivity, ocular dominance, and cytochrome oxidase-reactive regions in Macaque monkey striate cortex. *Cerebral Cortex*, 6:297–310.
- 410
- 411 Zenger-Landolt, B. and Heeger, D. J. (2003). Response suppression in V1 agrees with psychophysics of surround masking. *Journal of Neuroscience*, 23(17):6884–6893.
- 412
- 413 Zhou, J., Baker, D. H., Simard, M., Saint-Amour, D., and Hess, R. F. (2015). Short-term monocular patching boosts the patched eye's response in visual cortex. *Restorative Neurology and Neuroscience*, 33:381–387.
- 414
- 415 Zhou, J., Clavagnier, S., and Hess, R. F. (2013). Short-term monocular deprivation strengthens the patched eye's contribution to binocular combination. *Journal of Vision*, 13:5(12):1–10.
- 416
- 417 Zhou, J., Reynaud, A., and Hess, R. F. (2014). Real-time modulation of perceptual eye dominance in humans. *Proceedings of the Royal Society B*, 281(20141717):1–6.
- 418
- 419 Zhou, J., Reynaud, A., and Hess, R. F. (2017). Aerobic exercise effects on ocular dominance plasticity with a phase combination task in human adults. *Neural Plasticity*, 4780876:1–7.
